# Supplementary material for: The Crystal Structure of the R280K Mutant of Human p53 Explains the Loss of DNA Binding
Source: PubMed Central journal article supplement (PMC5979565; doi:10.3390/ijms19041184), 2018-04-13
Supplement: ijms-19-01184-s001.pdf [file ijms-19-01184-s001.pdf]

## Supplementary Material

### “The crystal structure of the R280K mutant of human p53 explains the loss of DNA binding”

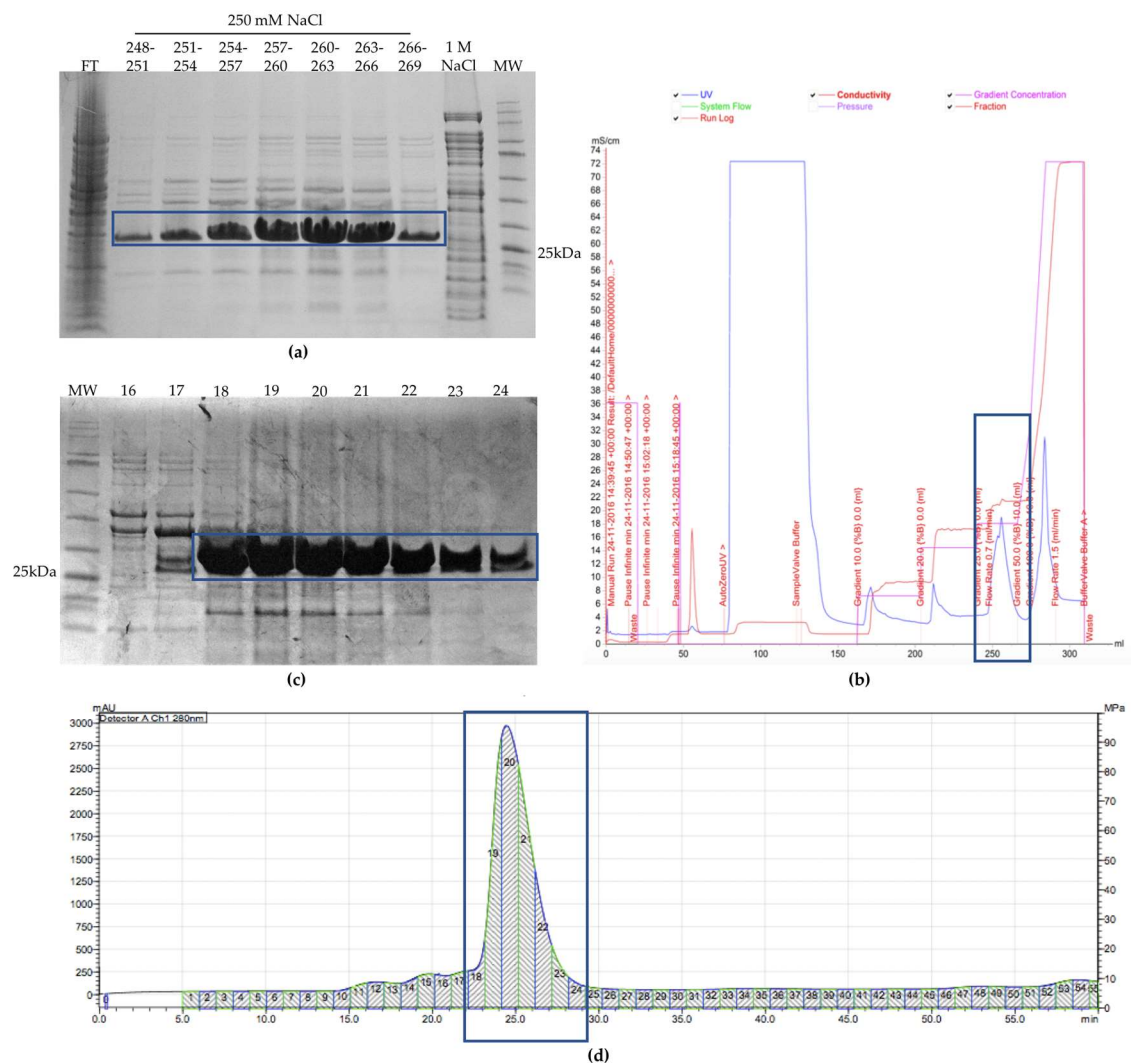

**Figure S1.** Purification of mutant p53R280K DBD. Blue squares delimitate the expressed and purified mutant p53R280K DBD protein. **(a)** SDS-page monitoring of mutant p53R280K DBD containing fractions eluted with 250 mM of NaCl (248-269 mL, 3 mL each fraction) after heparin-affinity chromatography. **(b)** Heparin-affinity chromatography profile (blue line - absorbance at 280 nm). **(c)** SDS-page monitoring of mutant p53R280K DBD after gel filtration chromatography. **(d)** Gel filtration chromatography profile (absorbance at 280 nm). FT – flow through; MW – molecular weight.

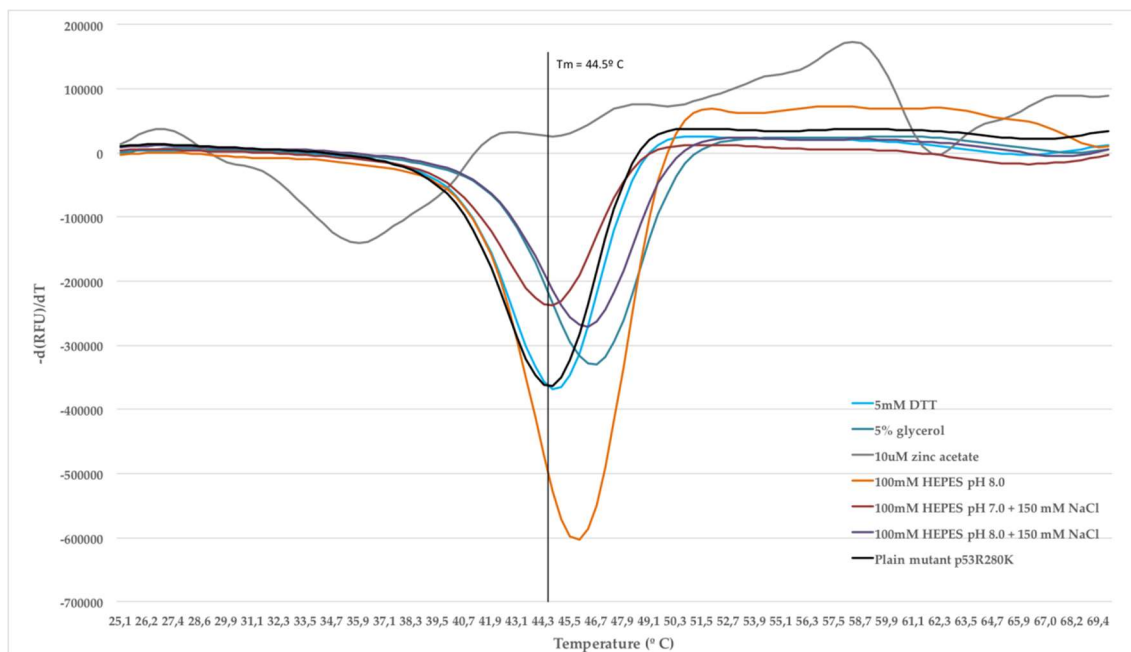

**Figure S2.** Thermal denaturation of mutant p53R280K DBD obtained using a DSF screening of buffers and additives. The black vertical line indicates the  $T_m$  of mutant p53R280K DBD (black curve). The colored curves represent the thermal denaturation of the studied protein in different conditions of buffers and additives that exhibit an increase of  $T_m$ , therefore a thermal stability increase. Only the best conditions that enabled to disclose the final buffer composition were represented.

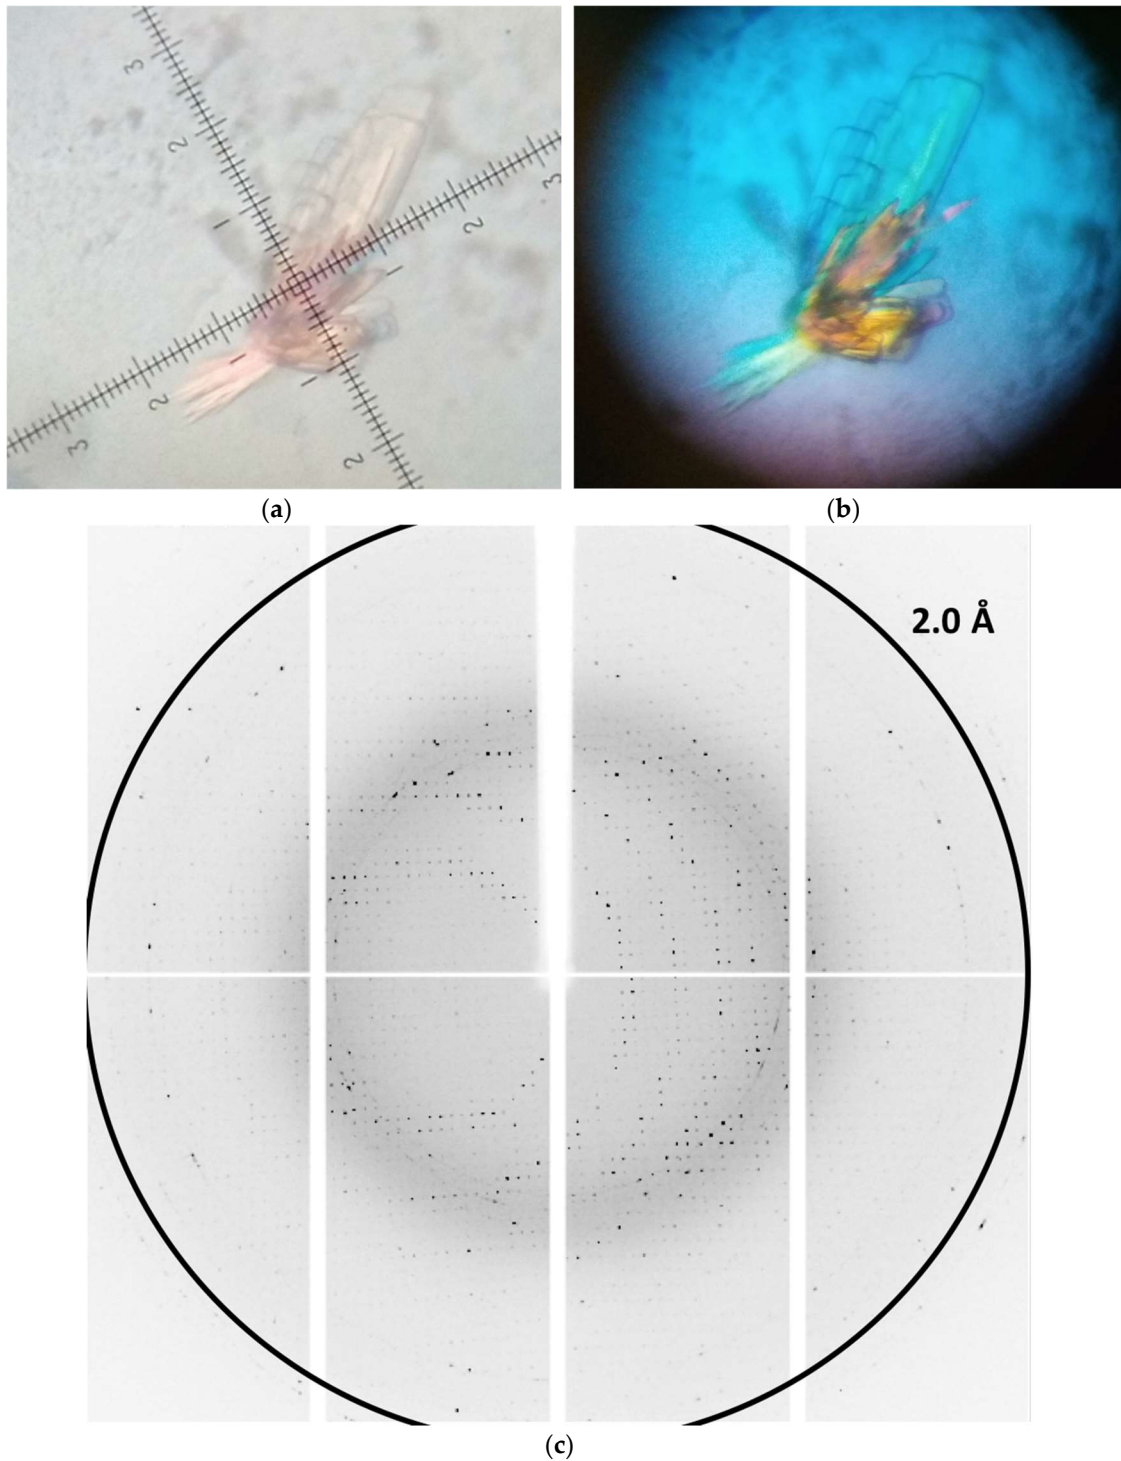

**Figure S3.** (a) Agglomerate of plate-shaped crystals of p53R280K grown by the sitting-drop vapour-diffusion method in buffer SB. (b) Same crystals viewed under polarized light. The average crystal size is  $0.3 \times 0.1 \text{ mm}^2$ . (c) X-ray diffraction image of p53R280K. The circle delimitates the high-resolution limit at  $2.0 \text{ \AA}$ . The diffraction image was obtained at 12.81 keV (ID30A-3, ESRF) using a crystal-to-detector distance of 144.8 mm and an oscillation angle of  $0.15^\circ$ .
